# Supplementary material for: Central Role of CD169+ Lymph Node Resident Macrophages in the Adjuvanticity of the QS-21 Component of AS01
Source: PubMed Central journal article supplement (PMC5172233; doi:10.1038/srep39475), 2016-12-20
Supplement: srep39475-s1.pdf [file srep39475-s1.pdf]

## Central Role of CD169<sup>+</sup> Lymph Node Resident Macrophages in the Adjuvanticity of the QS-21 Component of AS01.

Sophie Detienne<sup>1\*</sup>, Iain Welsby<sup>1\*</sup>, Catherine Collignon<sup>2</sup>, Sandrine Wouters<sup>2</sup>, Margherita Coccia<sup>2</sup>, Sophie Delhay<sup>2</sup>, Laurye Van Maele<sup>1</sup>, Séverine Thomas<sup>1</sup>, Maëlle Swertvaegher<sup>1</sup>, Aurélie Detavernier<sup>1</sup>, Abdelatif Elouahabi<sup>2</sup>, Stanislas Goriely<sup>1†</sup> and Arnaud Didierlaurent<sup>2†</sup>.

<sup>1</sup>Institute for Medical Immunology (IMI), Université Libre de Bruxelles, Rue Adrienne Bolland 8, B-6041 Gosselies, Belgium.

<sup>2</sup>GSK Vaccines, Rue de l'Institut 89, B-1330 Rixensart, Belgium

\* and †: These authors contributed equally to the work.

Supplementary Figures

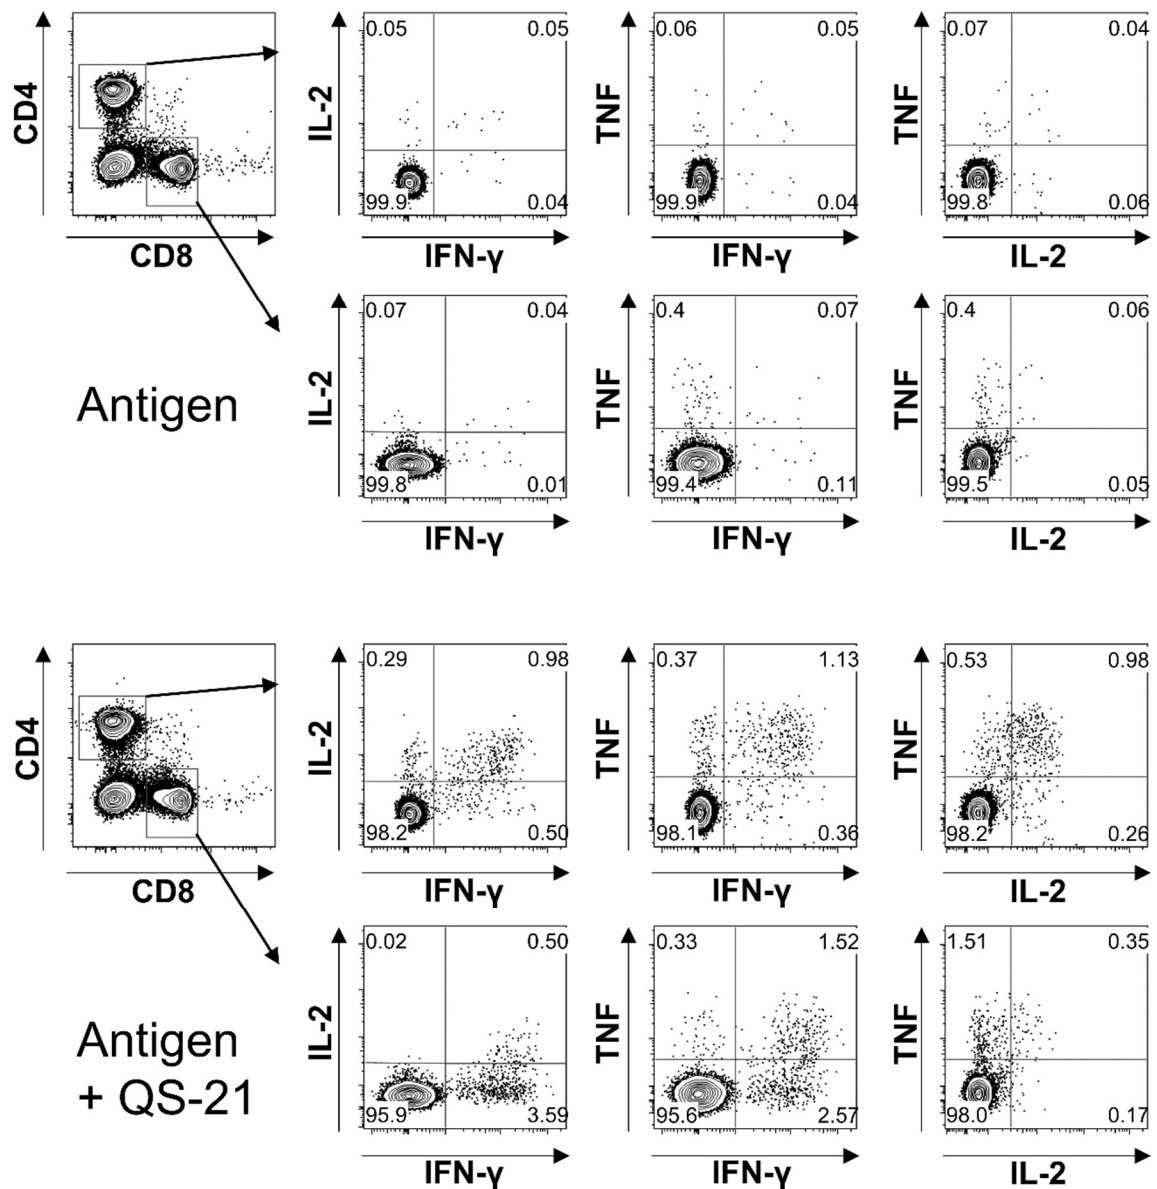

**Supplementary Figure 1.** Intracellular cytokine stain. Following antigenic peptide restimulation, T cells were gated on either CD4 or CD8-positive cells and IL-2, IFN- $\gamma$  or TNF production was assessed. One mouse immunised with antigen alone and one mouse immunised with QS-21-adjuvanted antigen are shown.

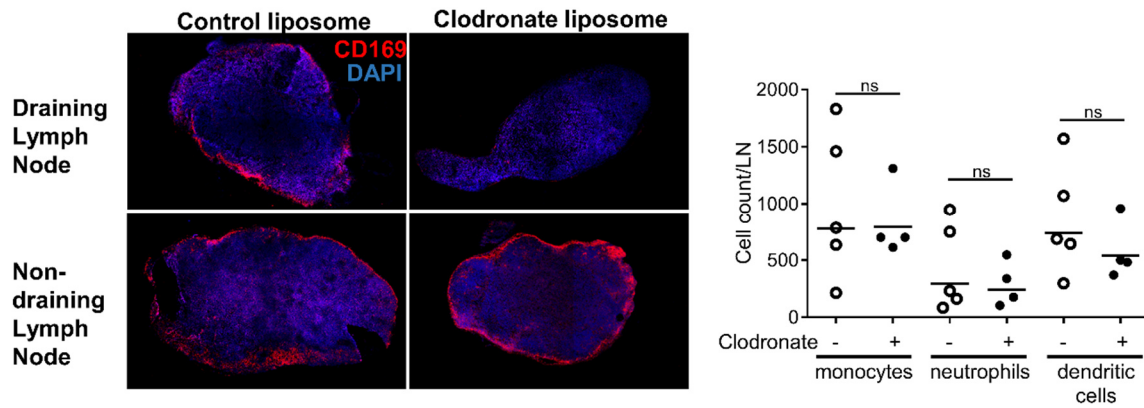

**Supplementary Figure 2.** Related to figure 4. A) 6 days after clodronate liposome injection, the draining (iliac) and non-draining (cervical) lymph nodes were recovered and stained with DAPI (nuclei - blue) and anti-CD169 (red) antibodies. B) DLNs were recovered at day 6 post clodronate liposome (CL) injection. Monocytes ( $\text{Lin}^- \text{CD11b}^+ \text{Ly6C}^+ \text{Ly6G}^-$ ), neutrophils ( $\text{SSC}^{\text{hi}} \text{Lin}^- \text{CD11b}^+ \text{Ly6C}^{\text{int}} \text{Ly6G}^+$ ) and dendritic cells ( $\text{Lin}^- \text{CD11c}^+ \text{IA/IE}^{\text{hi}}$ ) were quantified by flow cytometry (n=4-5).

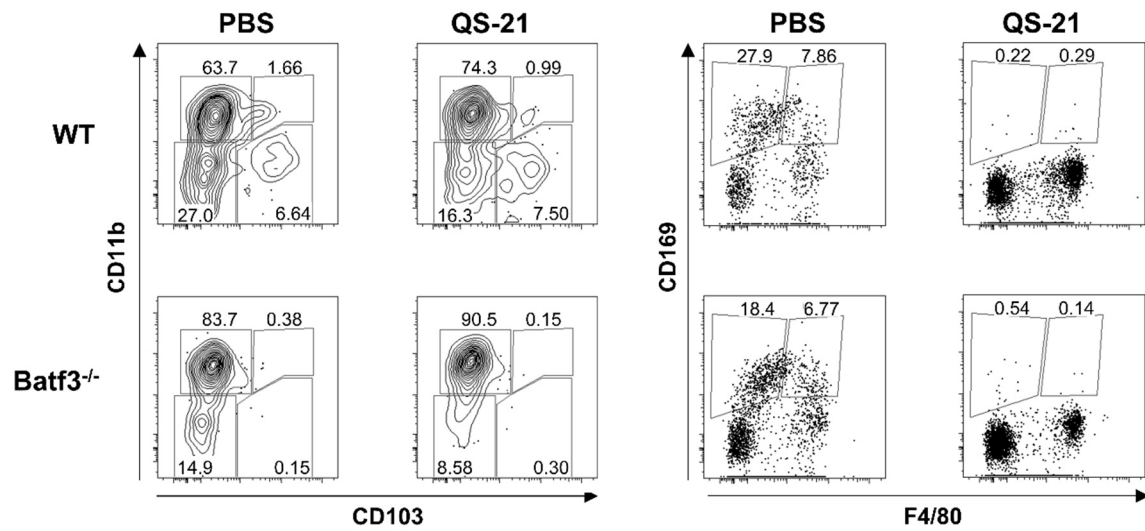

**Supplementary Figure 3.** Related to figure 5. 24h after PBS or QS-21 injection, dendritic cell and CD169<sup>+</sup> cell subset frequencies in WT and Batf3<sup>-/-</sup> mice were analysed by flow cytometry.

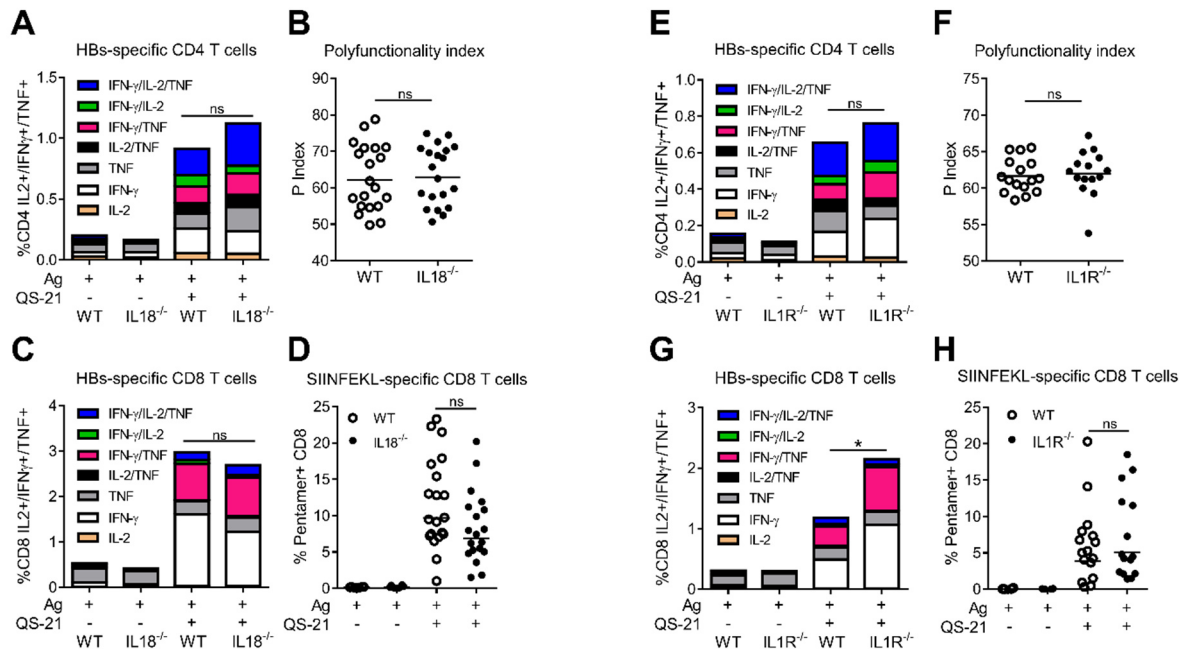

**Supplementary Figure 4.** Antigen-specific T cell responses are normal in IL-18 and IL-1R KO mice. A-B) WT and IL-18 KO mice were immunised as in figure 1A. At day 21, cytokine production (IL-2, IFN- $\gamma$ , TNF) of HBs-specific CD4 (A) and CD8 (C) T cells were evaluated by intracellular staining. The data is represented as median of 6 (Ag) or 20 (QS-21) mice. CD4 T cell polyfunctionality index was calculated as described (B) and the frequency of OVA-specific circulating CD8 T-cells (D) was assessed by pentamer staining (Ag: n=6, QS-21: n=20). WT and IL-1 receptor KO mice were immunised as in 1A. At day 21, cytokine production (IL-2, IFN- $\gamma$ , TNF) of HBs-specific CD4 (E) and CD8 (G) T cells were evaluated by intracellular staining. The data is represented as the median value of 4 (Ag) or 16 (QS-21) mice. The CD4 T cell polyfunctionality index was calculated as described (F) and the frequency of OVA-specific circulating CD8 T-cells (H) were assessed by pentamer staining (Ag: n=6, QS-21: n=16)

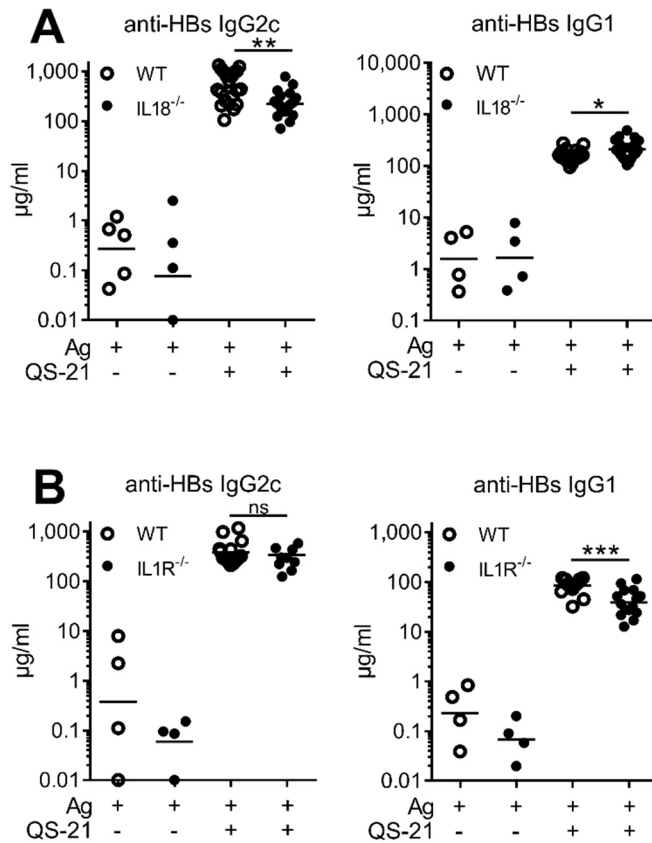

**Supplementary Figure 5.** *Antibody production partially depends on IL-18 and IL-1R-mediated signalling events.* WT and IL-18 KO (A) or IL1-R KO (B) mice were immunised as in 1A. Anti-HBs IgG1 and IgG2c in the serum at day 21 were measured by ELISA (Ag: n=4-5, QS-21: n=20). Each point represents a single mouse and the horizontal bar represents the geometric mean. Statistical significance was determined by a non-parametric Mann Whitney t-test. The data represents a pool of 2 independent experiments.

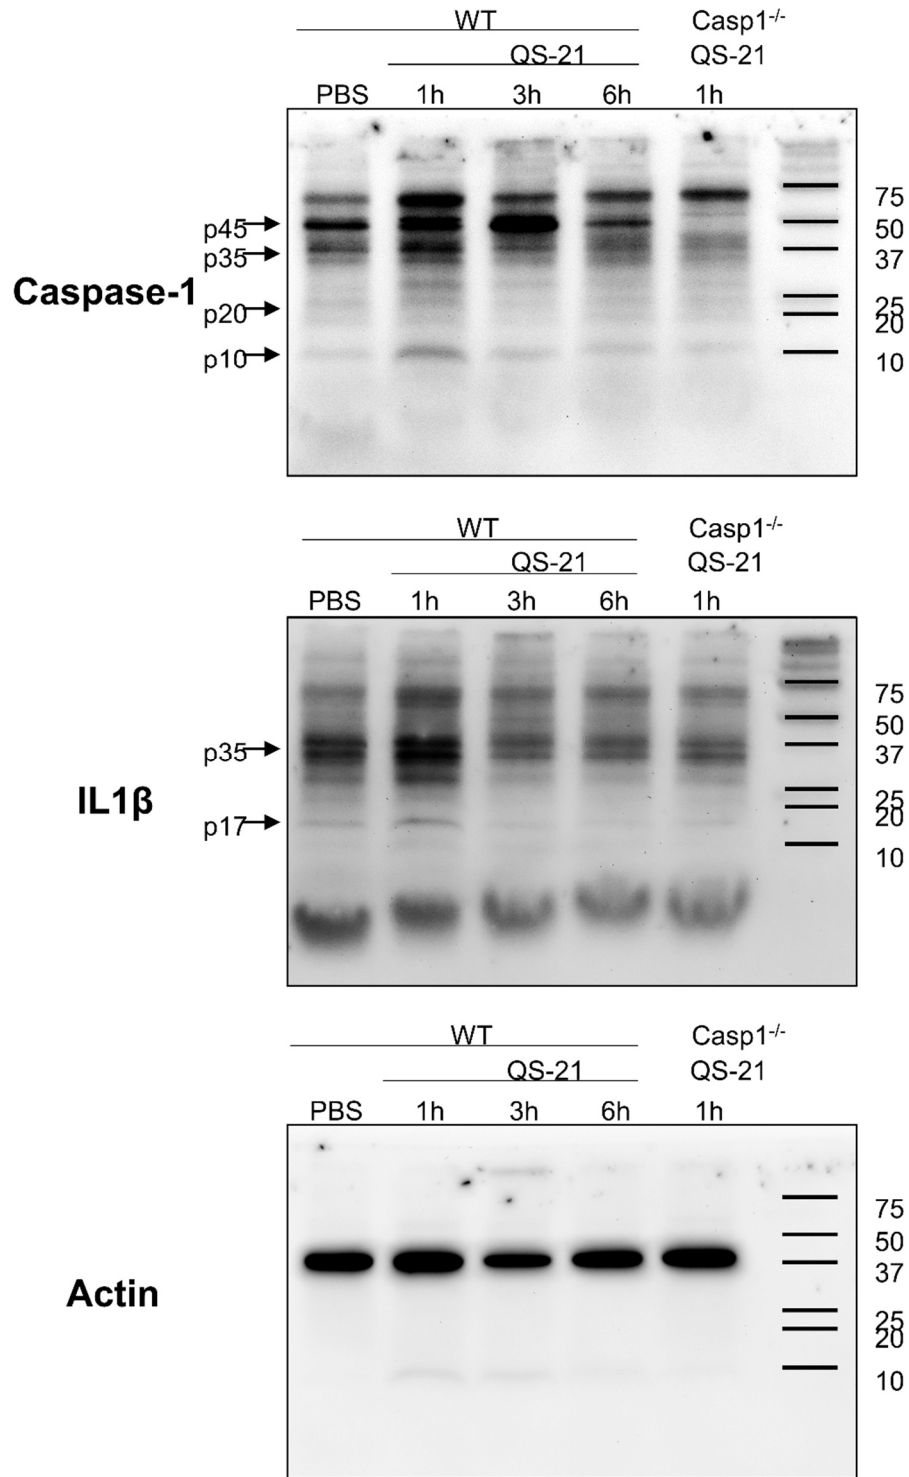

**Supplementary Figure 6.** Uncropped immunoblots for Figure 6B
